# Supplementary material for: De novo species identification using 16S rRNA gene nanopore sequencing
Source: PeerJ. 2020 Oct 21;8:e10029. doi: 10.7717/peerj.10029 (PMC7585375; doi:10.7717/peerj.10029)
Supplement: Supplemental Information 4 [file peerj-08-10029-s004.xlsx]

## Sheet: Sheet1
Birth (0 = vaginal, 1 = sectio)	Barcode (nanopore)
0	BC01
0	BC13
1	BC25
0	BC37
1	BC49
0	BC61
0	BC73
0	BC85
0	BC02
0	BC14
0	BC26
0	BC38
0	BC50
0	BC62
0	BC74
1	BC86
0	BC03
0	BC15
0	BC27
0	BC39
1	BC51
0	BC63
0	BC75
0	BC87
0	BC04
1	BC16
0	BC28
0	BC40
0	BC52
0	BC64
0	BC76
0	BC88
0	BC05
1	BC17
0	BC29
1	BC41
0	BC53
0	BC65
0	BC77
1	BC89
0	BC06
1	BC18
1	BC30
0	BC42
0	BC54
1	BC66
0	BC78
0	BC90
1	BC07
1	BC19
0	BC31
0	BC43
1	BC55
0	BC67
0	BC79
0	BC91
0	BC08
1	BC20
0	BC32
0	BC44
0	BC56
0	BC68
0	BC80
0	BC92
0	BC09
0	BC21
0	BC33
0	BC45
Missing	BC57
0	BC69
0	BC81
0	BC93
1	BC10
0	BC22
1	BC34
0	BC46
0	BC58
0	BC70
0	BC82
0	BC94
0	BC11
1	BC23
0	BC35
0	BC47
0	BC59
0	BC71
0	BC83
0	BC95
No info	BC12
No info	BC24
1	BC36
0	BC48
0	BC60
0	BC72
1	BC84
0	BC96
Sum c-section
20
