# Supplementary material for: De novo species identification using 16S rRNA gene nanopore sequencing
Source: PeerJ journal article supplement (doi:10.7717/peerj.10029), 2020-10-21
Supplement: SupplFig1.pdf [file SupplFig1.pdf]

# A

similarity (Jaccard)

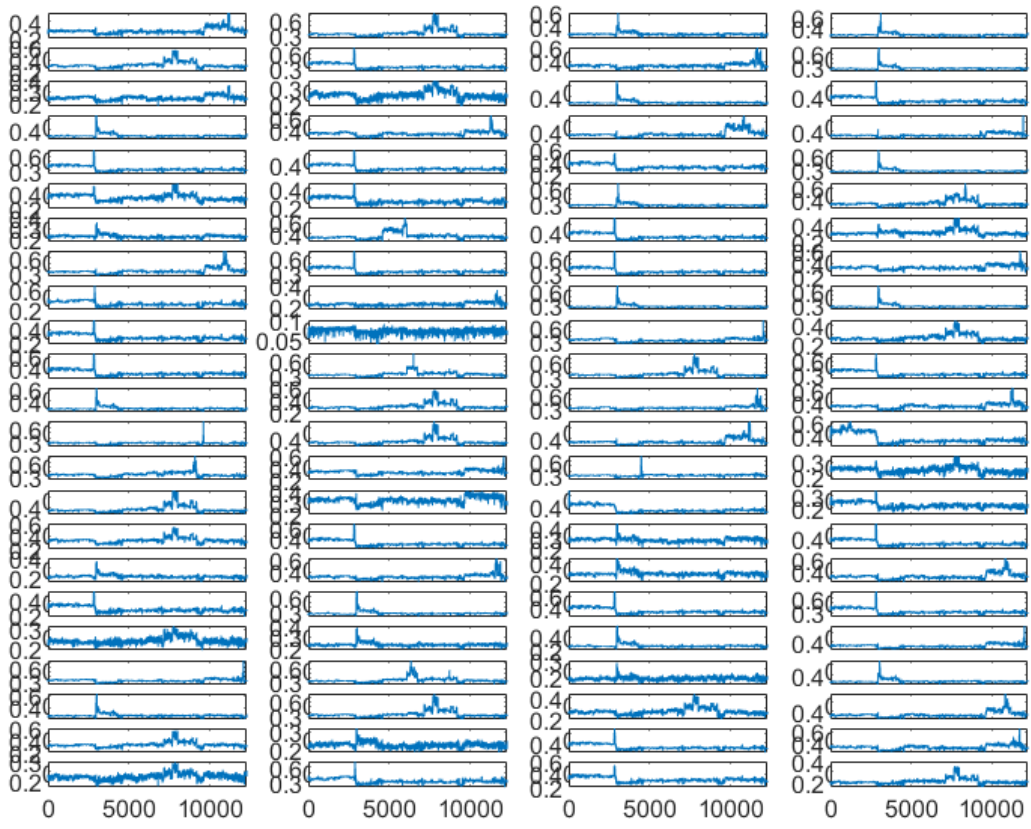

RDP II reference sequence #

# B

similarity (Jaccard)

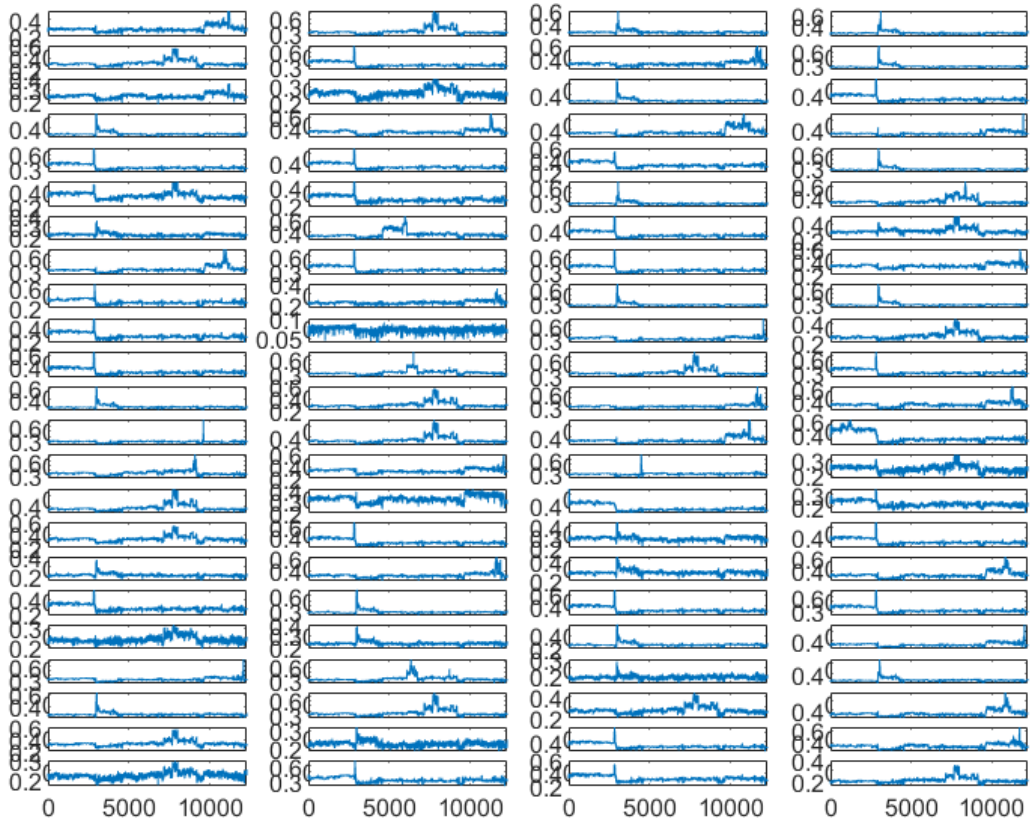

RDP II reference sequence #
